# Supplementary material for: Mathematical Estimation of Endogenous Proline as a Bioindicator to Regulate the Stress of Trivalent Chromium on Rice Plants Grown in Different Nitrogenous Conditions
Source: MDPI journal article supplement (doi:10.3390/toxics11100803), 2023-09-22
Supplement: s1 [file s1]

# Supplementary Materials: Mathematical estimation of endogenous proline as a bioindicator to regulate the stress of trivalent chromium on rice plants grown in different nitrogenous conditions

Chengzhi Li, Yuxi Feng, Peng Tian and Xiaozhang Yu

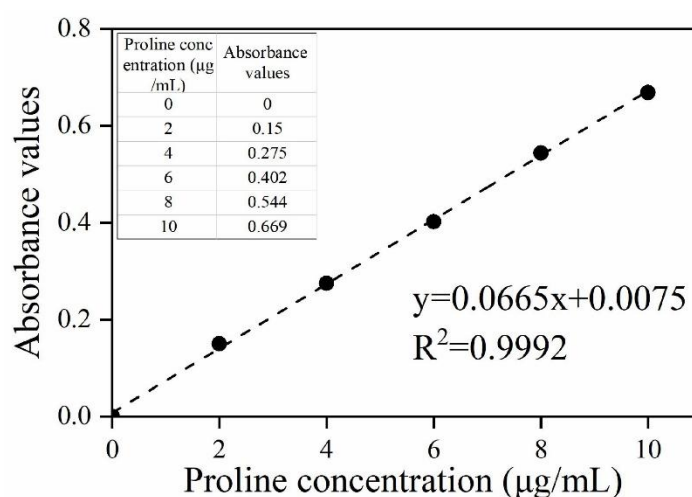

**Figure S1.** The standard curve between the absorbance at 520 nm and L-proline content. Series content of L-proline (0, 2, 4, 6, 8, and 10 μg/mL).
